# Supplementary material for: A dinuclear cobalt cluster as electrocatalyst for oxygen reduction reaction
Source: Royal Society of Chemistry journal article supplement (doi:10.1039/c9ra08068f), 2019-01-01
Supplement: c9ra08068f1.pdf [file c9ra08068f1.pdf]

**Electronic Supporting Information (ESI)**  
**for**

**A dinuclear cobalt cluster as electrocatalyst for oxygen reduction reaction**

Yun-Wu Li, Wen-Jie Zhang, Chun-Xia Li, Lin Gu, Hong-Mei Du, Hui-Yan Ma,\* Su-Na Wang,\*  
and Jin-Sheng Zhao\*

*Shandong Provincial Key Laboratory / Collaborative Innovation Center of Chemical Energy  
Storage and Novel Cell Technology, and School of Chemistry and Chemical Engineering,  
Liaocheng University, Liaocheng 252000, PR China.*

---

\*Corresponding authors.

E-mail addresses: mahuiyanyan@163.com (H. Y. Ma), wangsuna@lcu.edu.cn (S. N. Wang),  
j.s.zhao@163.com (J. S. Zhao).

---

## S1. Experimental Section

*Syntheses of catalyst.* Dinuclear  $\{\text{Co}^{\text{II}}_2\}$  cluster catalyst was synthesized according our reported experiment [reference 13 in main text] and as bellow:

A mixture of ligand Hpmat (27.7 mg, 0.1 mmol) in  $\text{CHCl}_3/\text{MeOH}$  (10/2 mL) was stirred and dissolved under 60 °C silicone oil bath. Then a solution of  $\text{Co}(\text{ClO}_4)_2 \cdot 6\text{H}_2\text{O}$  (55.01 mg, 0.15 mmol) in 5 mL MeOH was added dropwise in the above solution. The mixture stirred in 60 °C bath for 8 hours and then cooled to room temperature and filtered. Purple needle (macrography) shaped crystals of  $\{\text{Co}_2\}$  catalyst were collected. Yield: 13% based on Co. Elemental analysis (%) for  $\{\text{Co}_2\}$  catalyst,  $\text{C}_{16}\text{H}_{18}\text{ClCoN}_7\text{O}_6$  (M = 498.74): *Calcd.*: C, 38.53; H, 3.64; N, 19.66; *Found*: C, 38.81; H, 3.32; N, 19.46. IR (KBr disk,  $\text{cm}^{-1}$ ) see **Fig. S2** in **ESI**.

## S2. Figures in Supporting Information

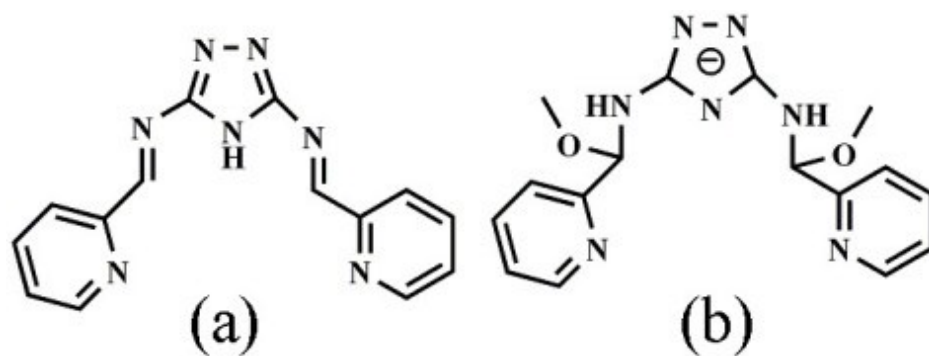

Fig. S1 The initial Hpmat ligand (a) and final pmmat<sup>-</sup> ligand (b) of {Co<sup>II</sup>} catalyst.

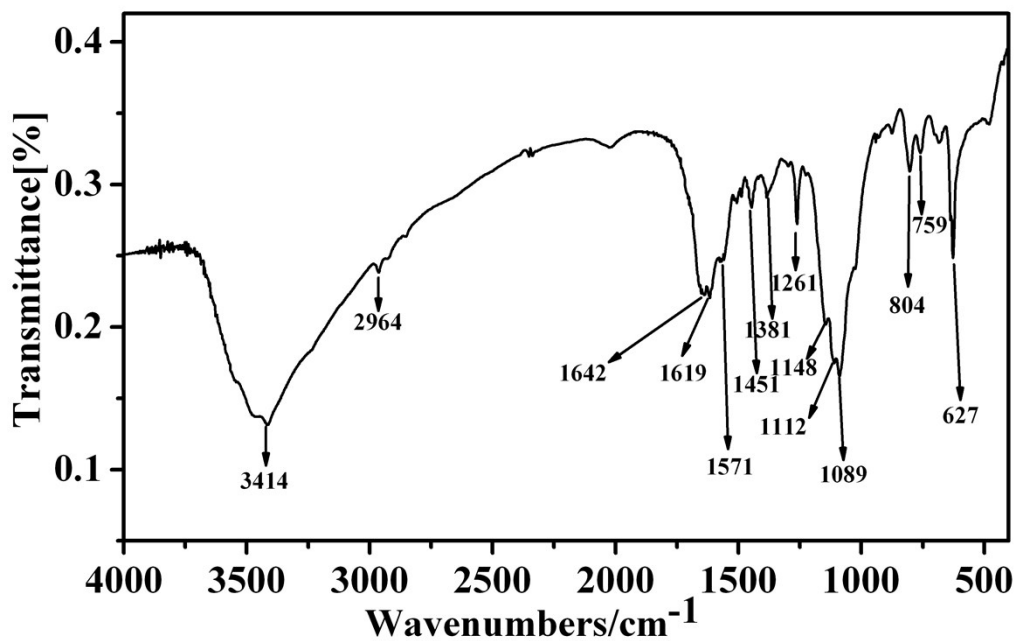

Fig. S2 IR spectra of {Co<sup>II</sup>} catalyst.

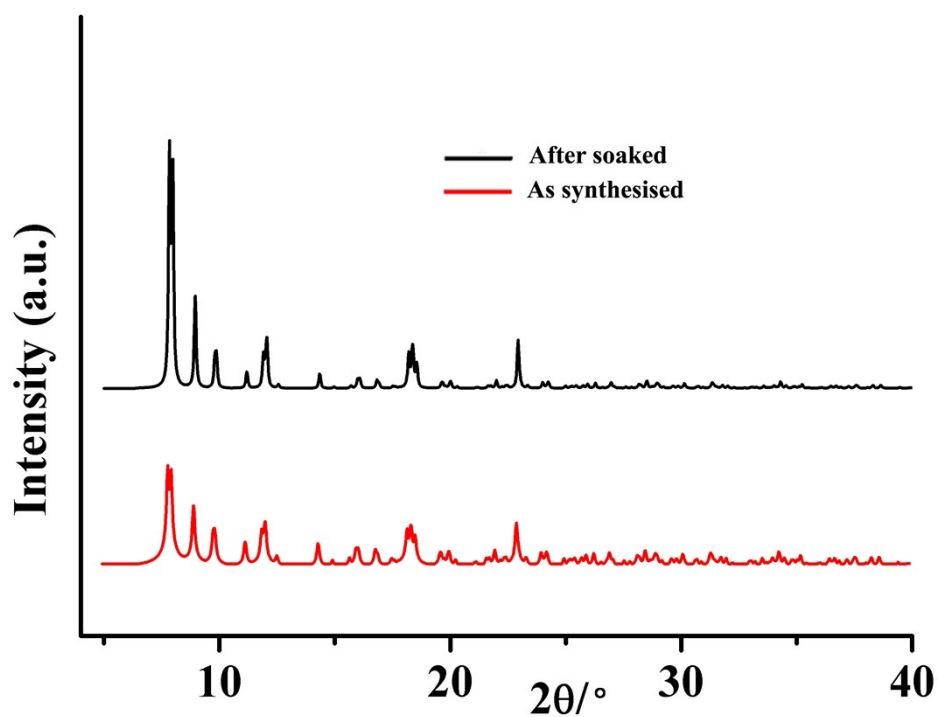

**Fig. S3** (a) The PXRD of as synthesised  $\{Co^{II}_2\}$  catalyst. (b) The PXRD of catalyst after soaked in mixture ink.

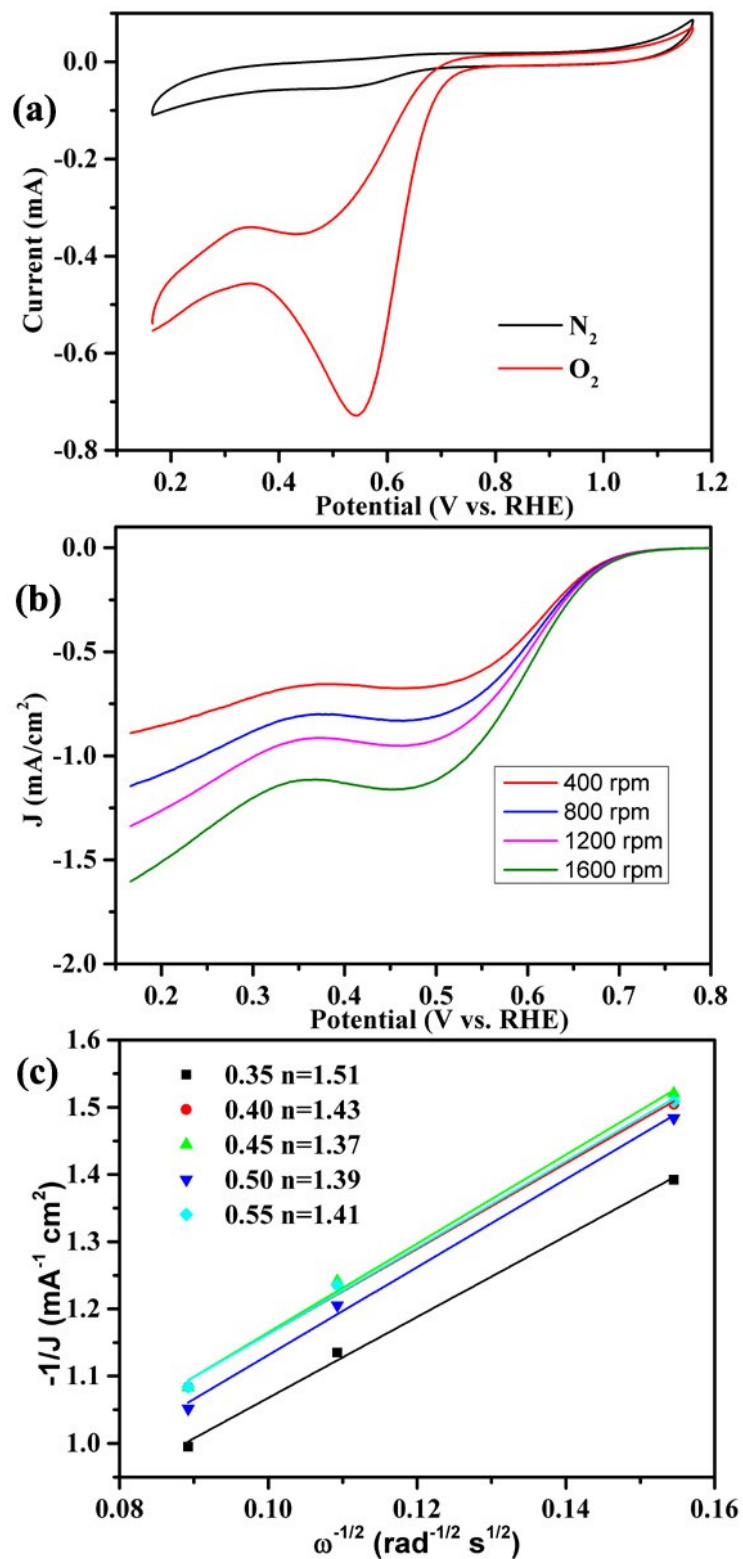

**Fig. S4** (a) CV curves of free ligand Hpmat. (b) LSV curves of free ligand Hpmat. (c) K-L plots of free ligand Hpmat at different potentials.

**S3. Table S1** Crystal Data and Structure Refinement Parameters for {Co<sup>II</sup><sub>2</sub>} catalyst.

| <b>Compound</b>                              | <b>{Co<sup>II</sup><sub>2</sub>} catalyst</b>                     |
|----------------------------------------------|-------------------------------------------------------------------|
| Formula                                      | C <sub>16</sub> H <sub>18</sub> ClCoN <sub>7</sub> O <sub>6</sub> |
| Fw                                           | 498.74                                                            |
| $\lambda/\text{\AA}$                         | 0.71073                                                           |
| $T/\text{K}$                                 | 298(2)                                                            |
| Crystal system                               | Orthorhombic                                                      |
| Space group                                  | <i>Pcca</i>                                                       |
| $a$ [Å]                                      | 22.1561(18)                                                       |
| $b$ [Å]                                      | 11.2746(7)                                                        |
| $c$ [Å]                                      | 19.7428(17)                                                       |
| $\alpha$ [°]                                 | 90                                                                |
| $\beta$ [°]                                  | 90                                                                |
| $\gamma$ [°]                                 | 90                                                                |
| $V$ (Å <sup>3</sup> )                        | 4931.8(7)                                                         |
| $Z$                                          | 4                                                                 |
| $D_c/\text{Mg}\cdot\text{m}^{-3}$            | 1.343                                                             |
| $F(000)$                                     | 2040                                                              |
| Reflections collected/unique                 | 24089/4364                                                        |
| $R_{\text{int}}$                             | 0.2293                                                            |
| Data/Restraints/Parameters                   | 4364/86/290                                                       |
| $R_1/wR_2$ [ $I > 2\sigma(I)$ ] <sup>a</sup> | 0.2000/0.4782                                                     |
| $R_1/wR_2$ [(all data)] <sup>a</sup>         | 0.2977/0.5397                                                     |
| GOF on $F^2$                                 | 1.175                                                             |

<sup>a</sup>  $R_1 = \Sigma(|F_0| - |F_C|)/\Sigma|F_0|$   $wR_2 = [\Sigma w(|F_0|^2 - |F_C|^2)^2/(\Sigma w|F_0|^2)^2]^{1/2}$ .
